# Supplementary material for: A new risk factor indicator for papillary thyroid cancer based on immune infiltration
Source: Springer Nature journal article supplement (doi:10.1038/s41419-020-03294-z), 2021-01-06

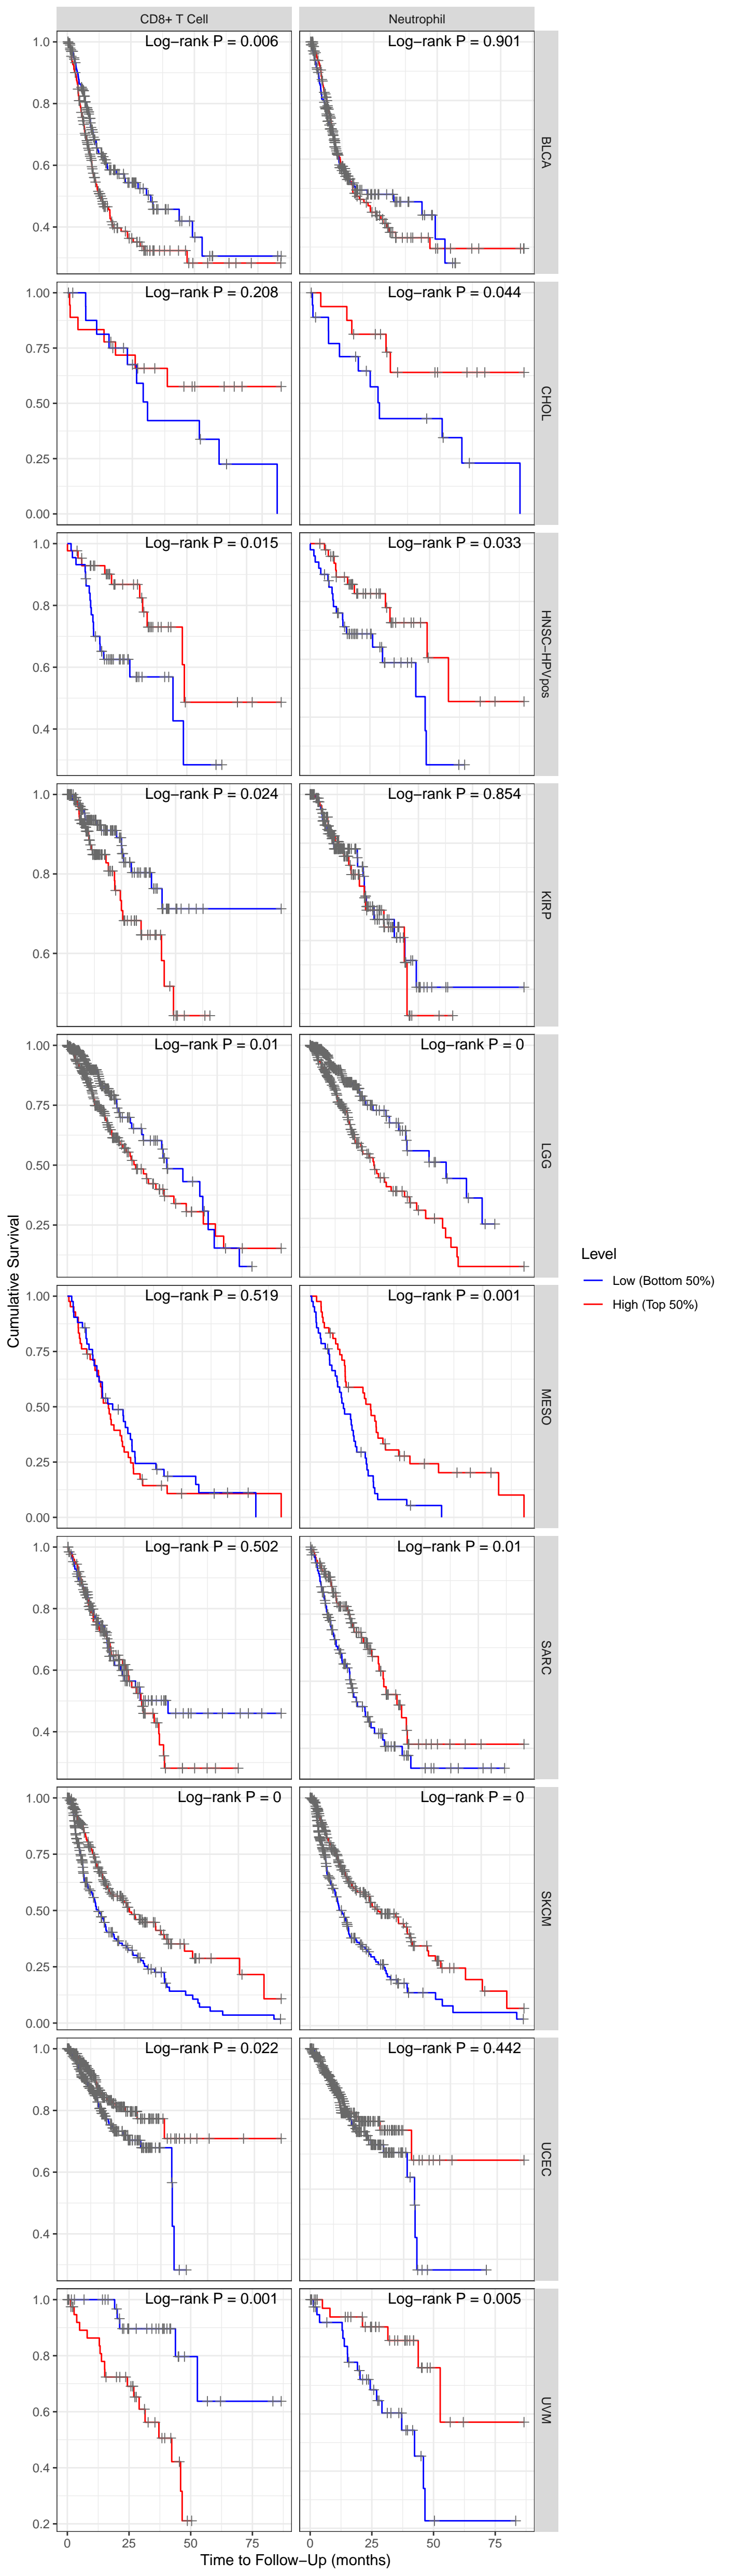

Supplement: 41419_2020_3294_MOESM5_ESM.pdf [file 41419_2020_3294_MOESM5_ESM.pdf]
